# Supplementary material for: Effective treatment of emulsified oil wastewater by the coagulation–flotation process
Source: Royal Society of Chemistry journal article supplement (doi:10.1039/c8ra06565a), 2018-01-01
Supplement: c8ra06565a1.pdf [file c8ra06565a1.pdf]

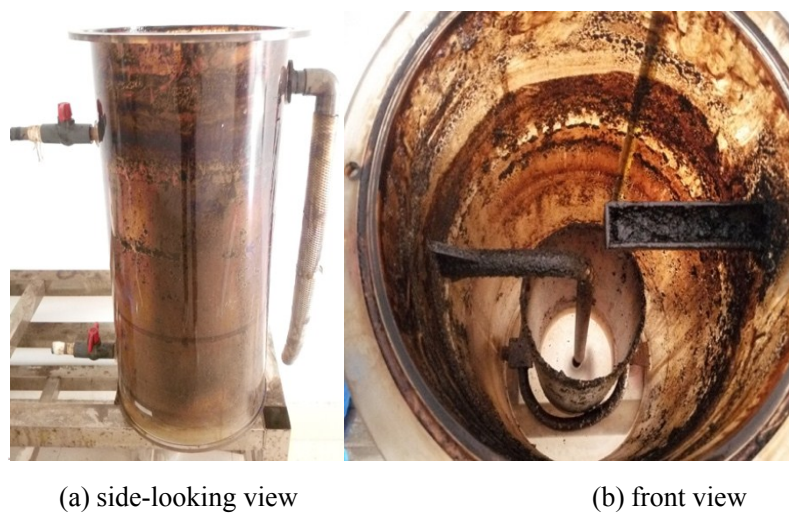

Fig. S1 Air flotation device diagram

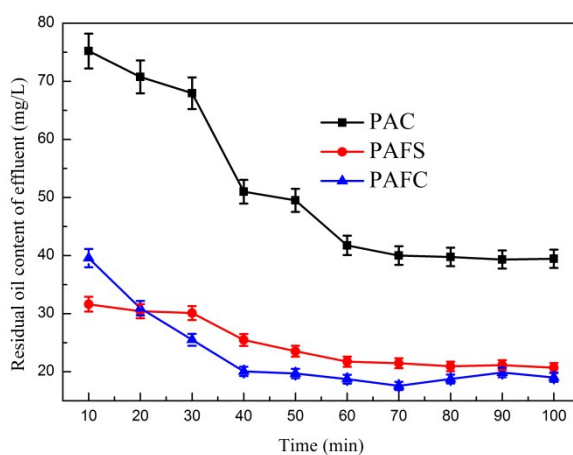

Fig. S2 Comparison of oil removal efficiency of coagulant in dynamic test

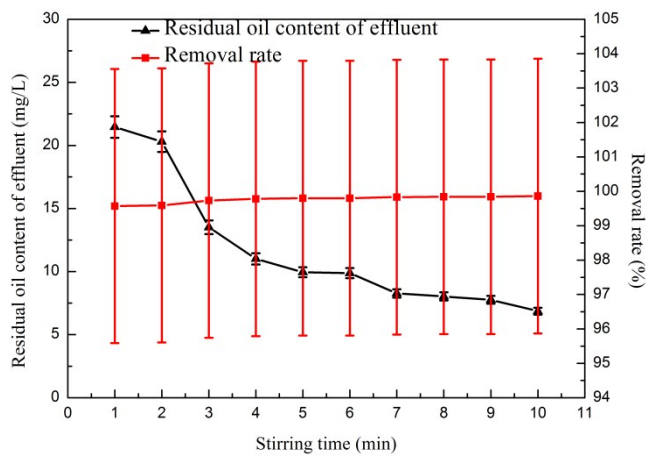

Fig. S3 Effect of stirring time on oil removal efficiency

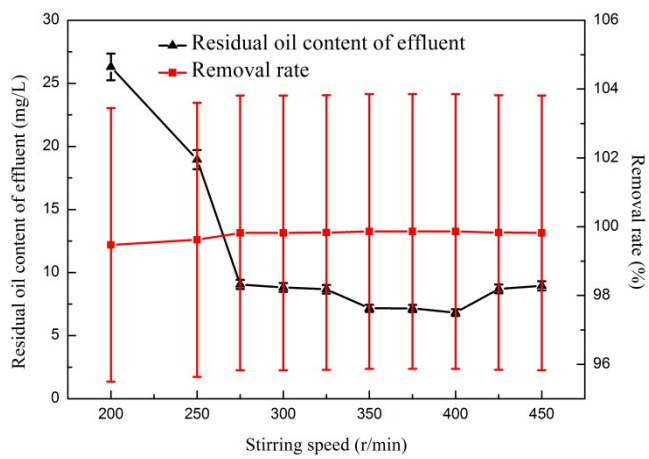

Fig. S4 Effect of stirring speed on oil removal efficiency

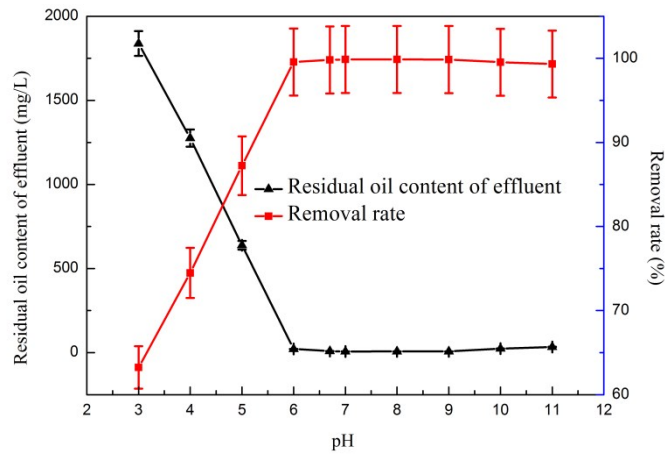

Fig. S5 Effect of pH value on oil removal efficiency

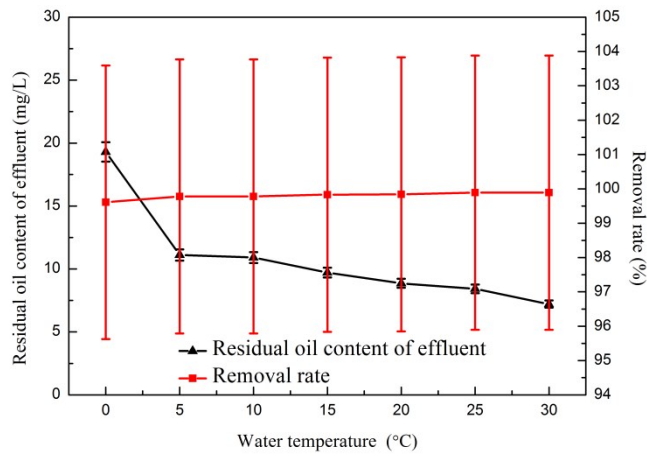

Fig. S6 Effect of water temperature on oil removal efficiency

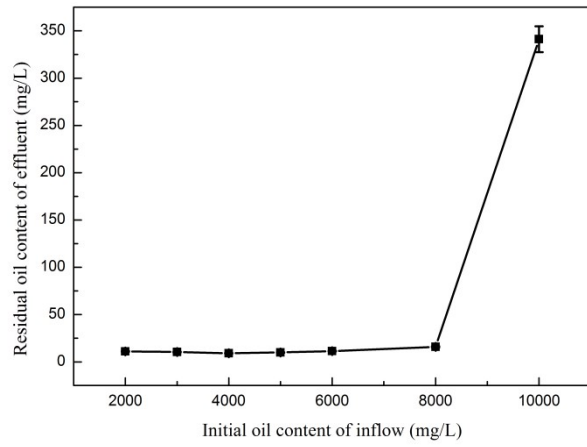

Fig. S7 Effect of initial oil content of inflow on coagulation degreasing

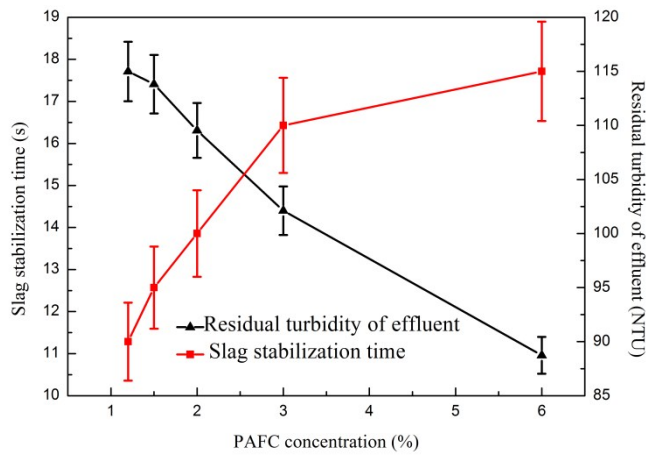

Fig. S8 Effect of PAFC concentration on dynamic test

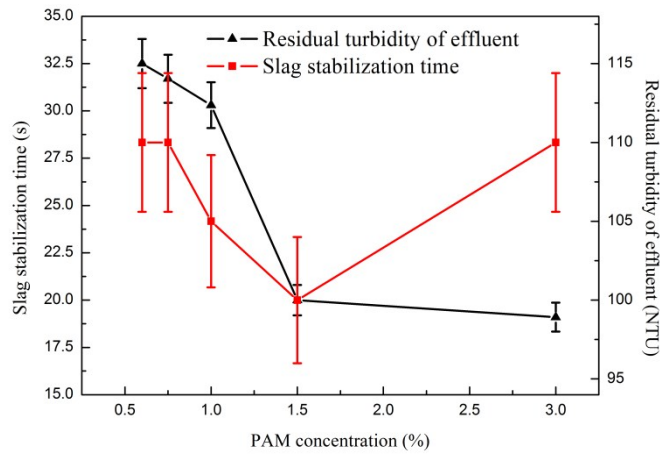

Fig. S9 Effect of polyacrylamide (PAM) concentration on dynamic turbidity removal

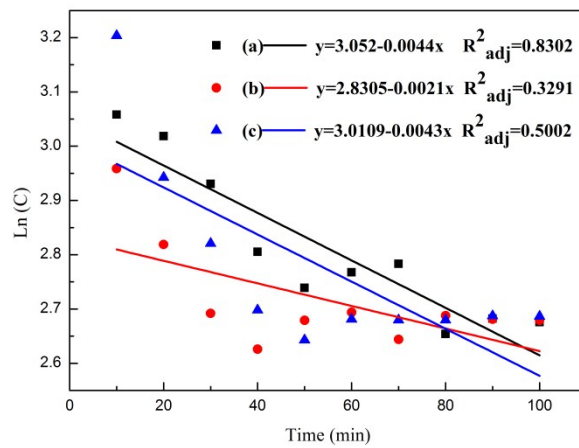

Fig. S10 Kinetic studies for oil removal at different inlet flow rate: (a) 0.125 m<sup>3</sup>/h, (b) 0.2 m<sup>3</sup>/h, (c) 0.25 m<sup>3</sup>/h

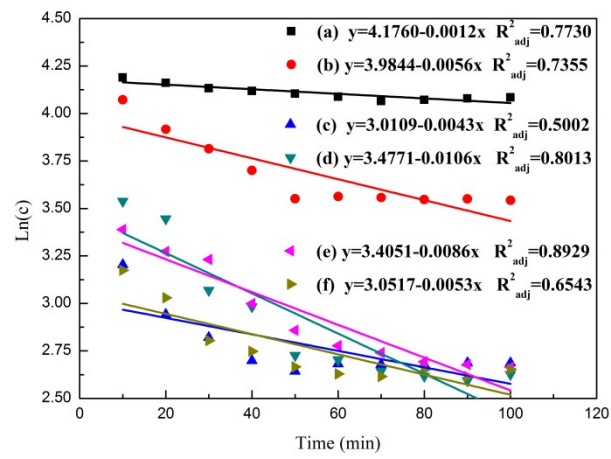

Fig. S11 Kinetic studies for oil removal at different initial inlet oil content: (a) 8000mgL, (b) 6000mgL, (c) 5000mgL, (d) 4000mgL, (e) 3000mgL, (f) 2000mgL,
